# Supplementary material
Source: publisher figshare collection journal article supplement (https://tandf.figshare.com/ndownloader/files/20960241)
Supplement: Supplementary file 1 [file 20960241]

S1 MS parameters of analytes and IS

|  | TG100-115 | Naproxen | Sorafenib | Imatinib |
| --- | --- | --- | --- | --- |
| Ion ionization | Negative | Negative | Positive | Positive |
| Transition | 345.4→234.6 | 228.8→184.7 | 465.3→270.1 | 494.3→394.3 |
| Collision energy(eV) | -50 | -10 | 45 | 40 |
| Declustering potential(s) | -140 | -40 | 86 | 75 |
| lonsprayVoltage(V) | -4500 | -4500 | 4500 | 4000 |
| Temperature | 400 | 400 | 400 | 400 |
| Ion Source Gas 1 | 12 | 50 | 10 | 15 |

S2. IC50 values of Hep-3B cell line cultured with micelles and free drugs for 48 and 72h.

| Incubation time (h) | TG100-115 | Sorafenib | TG100-115/Sorafenib | Micelles (pH 7.4) | | | Micelles (pH 6.8) | | |
| --- | --- | --- | --- | --- | --- | --- | --- | --- | --- |
| TG100-115 | | Sorafenib | TG100-115 | | Sorafenib |
| 48 | 8.6 | 4.6 | 3.6 | 7.2 | 4.2 | | 5.8 | 3.5 | |
| 72 | 5.1 | 3.7 | 3.1 | 5.3 | 3.8 | | 3.9 | 2.8 | |

| 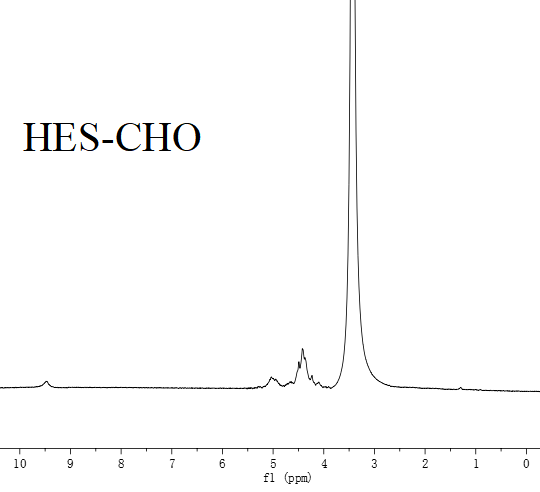 | 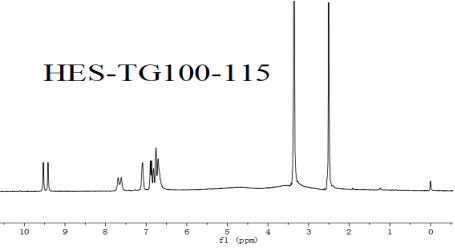 |
| --- | --- |
| 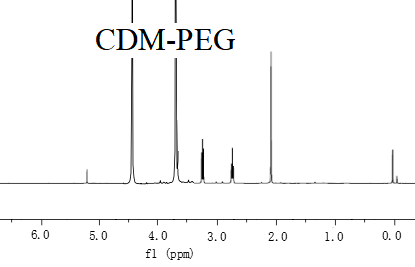 | 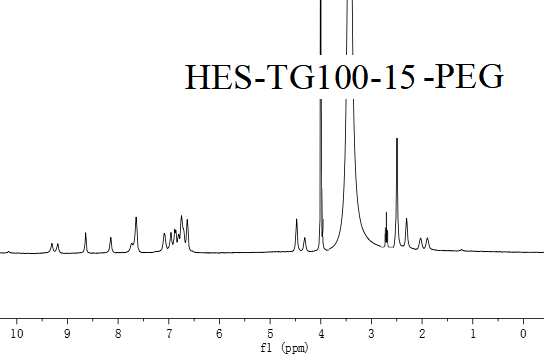 |

S3 1H NMR spectrums of HES-CHO, HES-TG100-115, CDM-PEG and HES-TG100-115-PEG

| 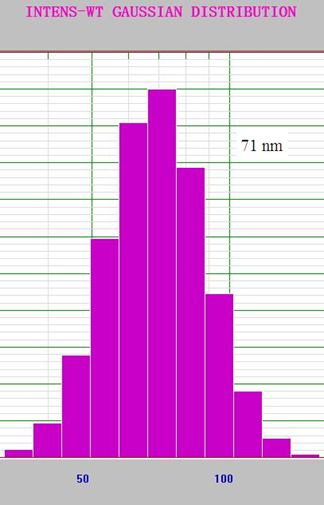 | 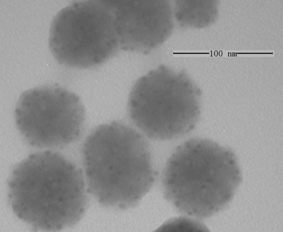 |
| --- | --- |

S4 Structure and particle size distribution of HES-TG100-115-PEG micelle


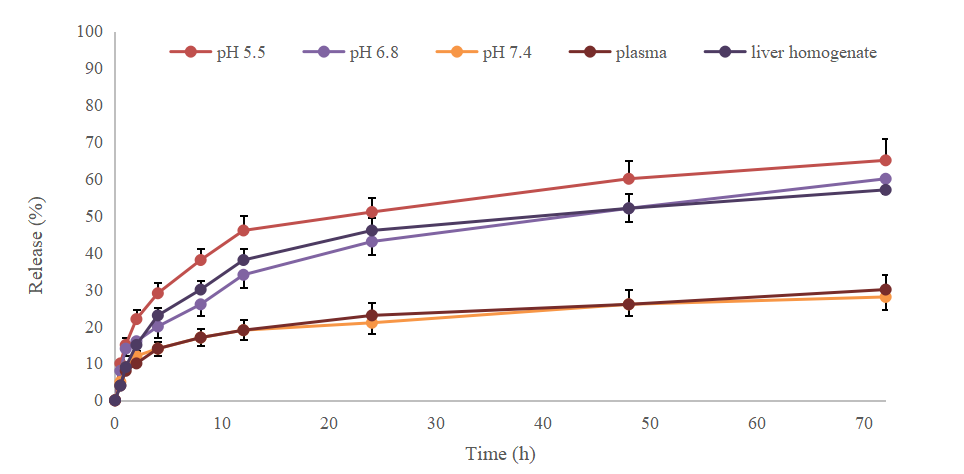


S5A. Cumulative release (%) of TG100-115 from micelle in different release medium at 37 ℃


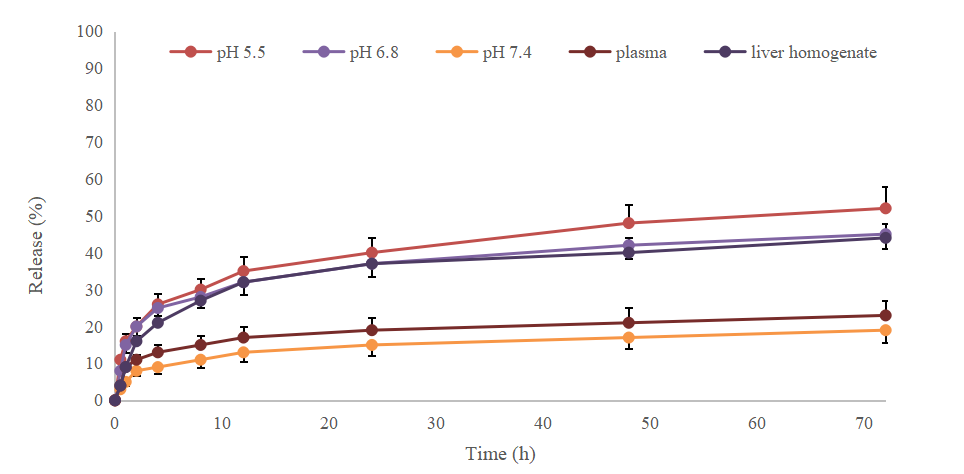

S5B. Cumulative release (%) of sorafenib from micelle in different release medium at 37 ℃
